# Supplementary material for: Color control and white upconversion luminescence of LaOF:Ln3+ (Ln = Yb, Er, Tm) nanocrystals prepared by the sol–gel Pechini method
Source: Royal Society of Chemistry journal article supplement (doi:10.1039/c3dt32721c), 2013-01-01
Supplement: c3dt32721c.pdf [file c3dt32721c.pdf]

Supporting Information

# **Color control and white upconversion luminescence of LaOF:Ln<sup>3+</sup> (Ln=Yb, Er, Tm) nanocrystals prepared by the sol-gel pechini method**

**Kezhi Zheng, Ye Liu, Zhenyu Liu, Zhe Chen, and Weiping Qin\***

*State Key Laboratory on Integrated Optoelectronics, College of Electronic Science*

*and Engineering, Jilin University, Changchun 130012, China*

*\* Corresponding author: wpqin@jlu.edu.cn*

Figure S1 shows the SEM images of the La<sub>0.89</sub>Yb<sub>0.1</sub>Er<sub>0.01</sub>OF samples prepared under different temperature (500°C – 1000°C). The morphology of the samples annealed at 500°C and 600°C is nearly spherical particles with their average diameters of ~70 nm and ~120 nm, respectively. Upon increasing the prepared temperature to 700°C or higher, the as-obtained samples exhibit web-like structure and their crystallite sizes increased gradually with increasing the annealing temperature, which can be confirmed from Fig. S1. For the samples synthesized under 700, 800, 900, and 1000°C, the corresponding particle sizes are of ~150 nm, ~180 nm, ~200 nm, and ~250 nm, respectively.

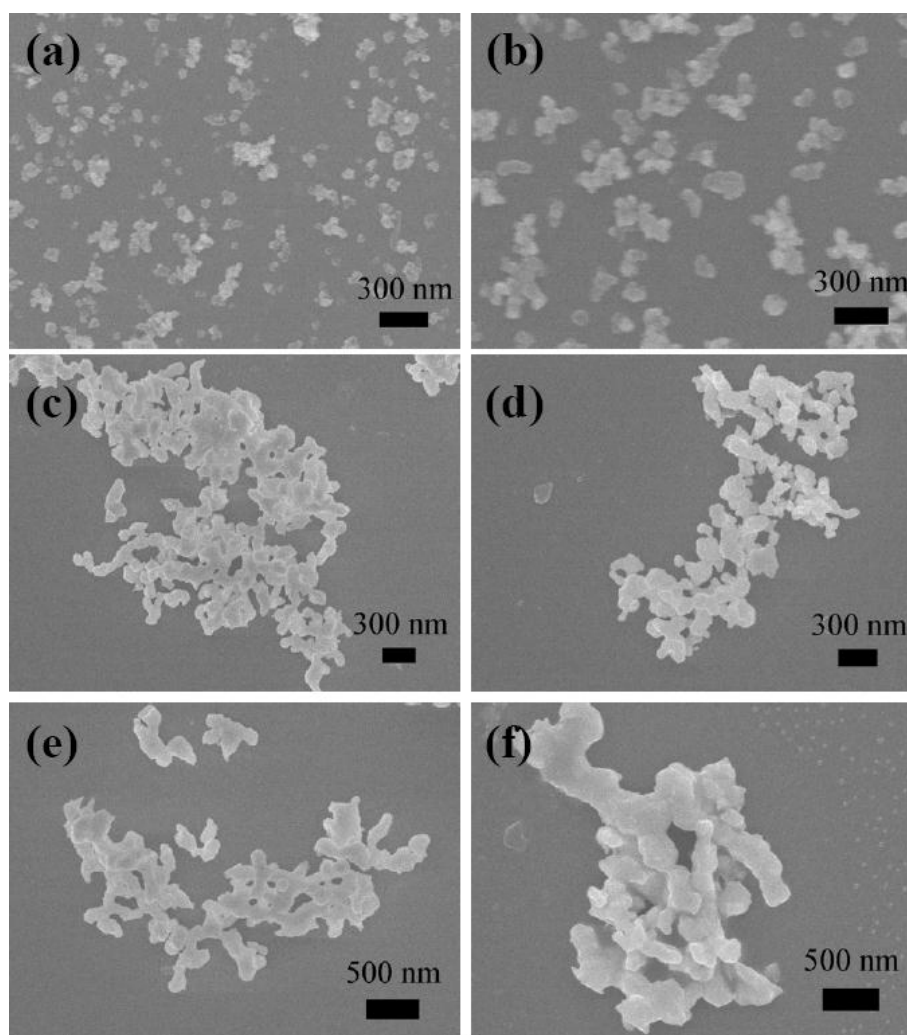

**Fig. S1.** SEM micrographs of the  $\text{La}_{0.89}\text{Yb}_{0.1}\text{Er}_{0.01}\text{OF}$  samples synthesized under different annealing temperature (a) 500°C, (b) 600°C, (c) 700°C, (d) 800°C, (e) 900°C, and (f) 1000°C.
